# Supplementary material for: Luminescence detection of CH2Cl2 by varying Cu⋯Cu interactions in a flexible porous coordination polymer
Source: Royal Society of Chemistry journal article supplement (doi:10.1039/d3qi01723k), 2023-01-01
Supplement: d3qi01723k1.pdf [file d3qi01723k1.pdf]

## Electronic Supplementary Information

### Luminescence Detection of CH<sub>2</sub>Cl<sub>2</sub> via Varying Cu···Cu Interaction in a Flexible Porous Coordination Polymer

Wei-Jie Zhang<sup>#,a</sup>, Wan-Tao Chen<sup>#,a</sup>, Chen-Hui Li,<sup>a</sup> Wen-Zhu Sun,<sup>a</sup> Jia-Wen Ye<sup>\*,a</sup>, Ling Chen<sup>\*,a</sup>, Hai-Ping Wang<sup>\*,a</sup>, Xiao-Ming Chen.<sup>b</sup>

<sup>a</sup>School of Biotechnology and Health Sciences, Wuyi University, Jiangmen, Guangdong 529000, PR China.

<sup>b</sup>MOE Key Laboratory of Bioinorganic and Synthetic Chemistry, School of Chemistry, Sun Yat-Sen University, Guangzhou 510275, PR China.

<sup>#</sup>These authors contributed equally.

## EXPERIMENTAL DETAILS

### General Methods

**DFT calculations.** The binding energy was calculated by Dmol3 module of Materials Studio 8.0 software package. The Perdew-Burke-Ernzerhof (PBE) generalized gradient approximation (GGA) exchange–correlation functional with the double numeric plus (DNP) polarization basis set was utilized.<sup>1</sup> The effective core potentials were used. Grimme semiempirical methods to describe the long-range van der Waals interactions. The DFT-D are employed to the dispersion correction.<sup>2</sup> The convergence tolerance was as follows:  $10^{-5}$  Ha (Energy), 0.002 Ha/Å (Max. force) and 0.005 Å (Max. displacement). The binding energy ( $\Delta E$ ) was computed by the following equation:  $\Delta E = E(\text{CP, without guest}) + E(\text{guest}) - E(\text{CP, with guest})$ . The calculation results are shown in Table S2.

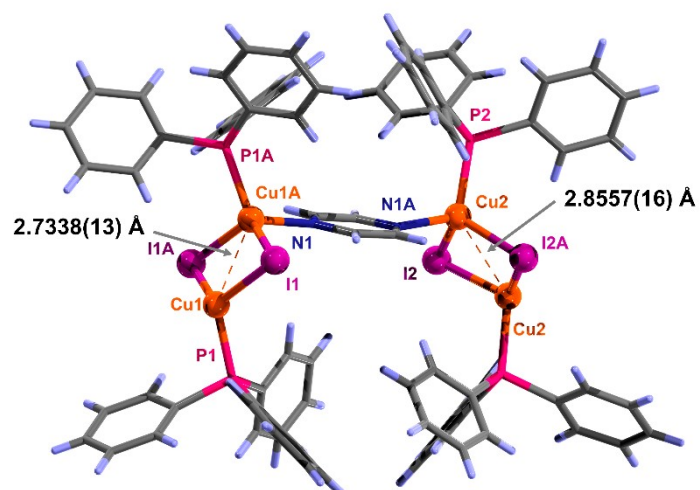

**Fig. S1.** The Cu...Cu distances in **CIPP** at room temperature. Color code: Cu, orange; I, purple; N, indigo; P, pink; C, gray; H, light purple.

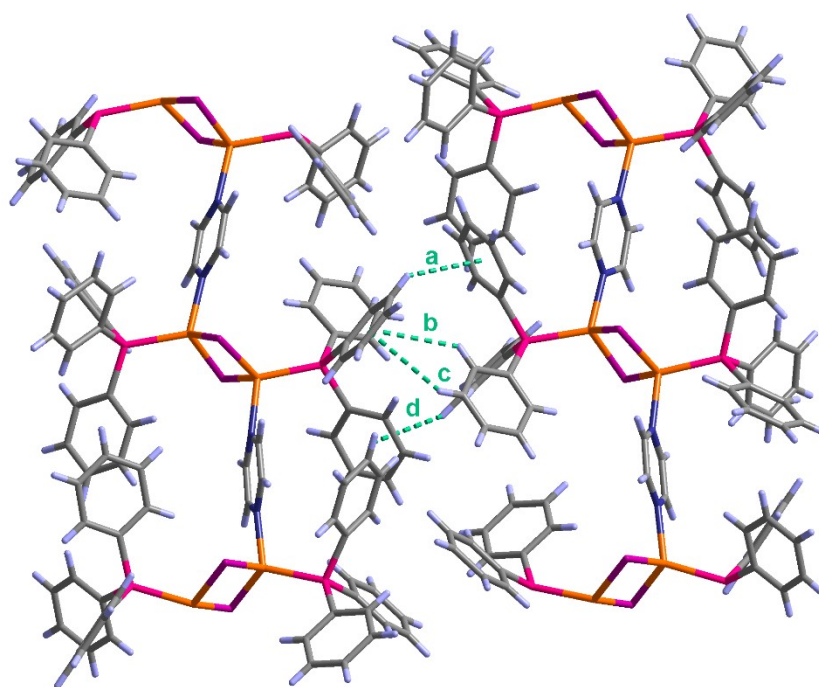

**Fig. S2.** The 1D chains in **CIPP** that are stacked by C-H... $\pi$  interactions. Color codes: Cu, orange; I, purple; N, indigo; P, pink; C, gray; H, light purple. Green dotted line, C-H... $\pi$ . a, 3.04 Å; b, 3.31 Å; c, 3.50 Å; d, 3.45 Å.

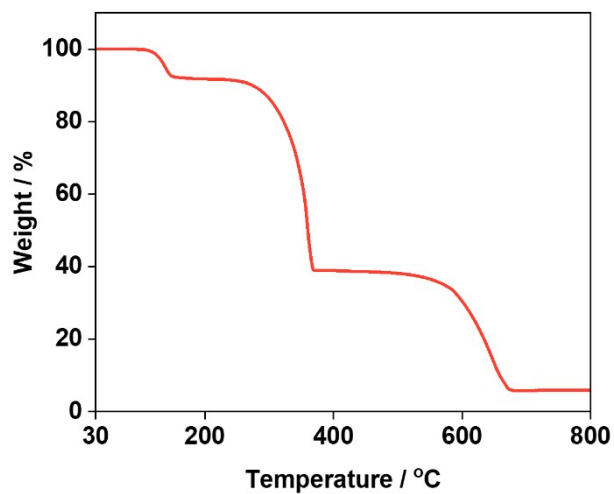

Fig. S3. The TG curve of CIPP.

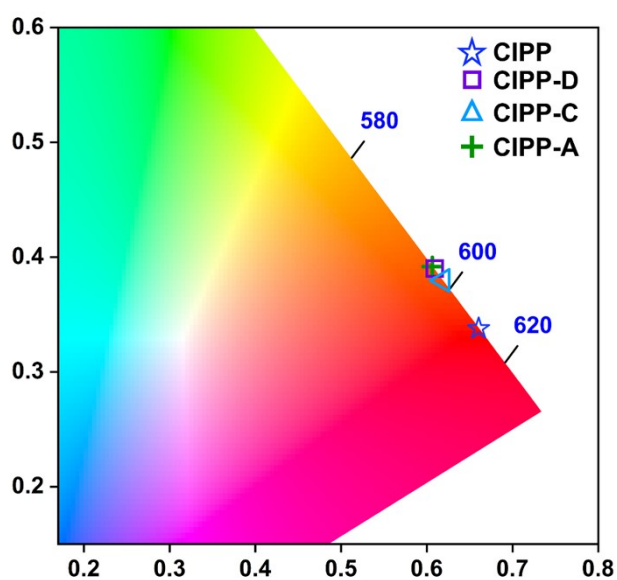

Fig. S4. CIE coordinates of CIPP, CIPP-D, CIPP-C and CIPP-A, respectively.

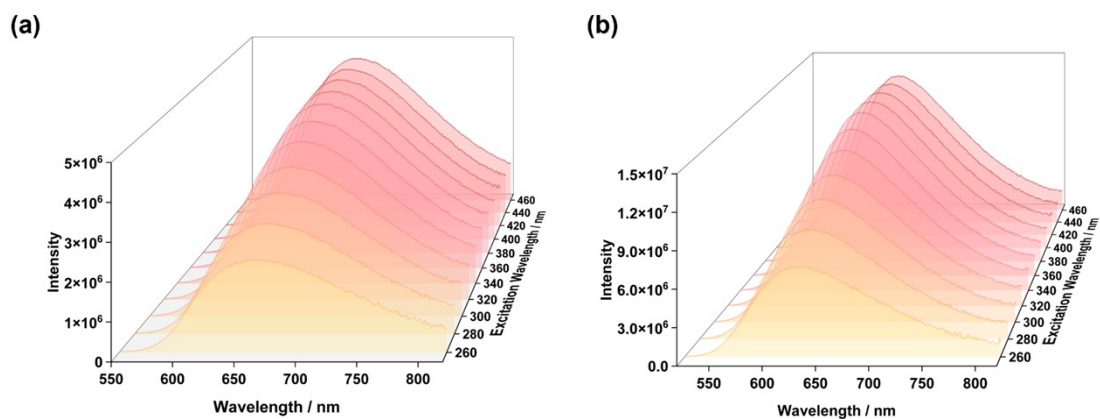

Fig. S5. The excitation-emission maps of (a) CIPP and (b) CIPP-D.

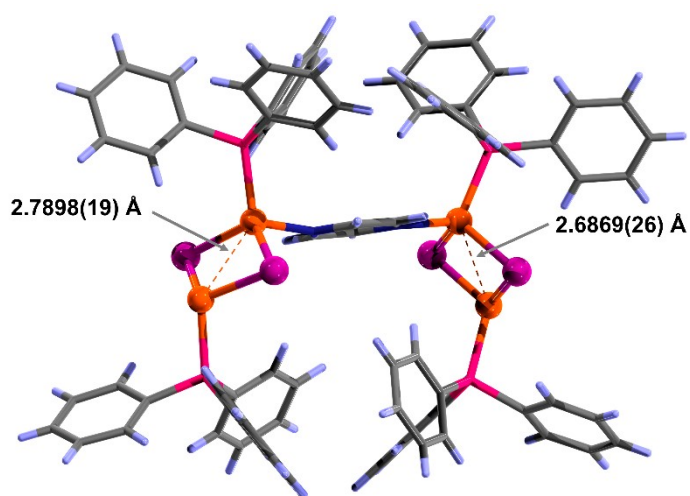

**Fig. S6.** The Cu...Cu distances in **CIPP** at 150 K. Color codes: Cu, orange; I, purple; N, indigo; P, pink; C, gray; H, light purple.

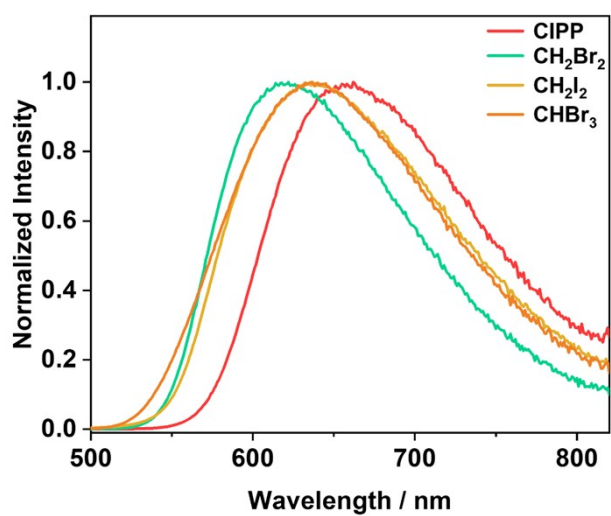

**Fig. S7.** The emission spectra of **CIPP** after exposure in different halohydrocarbon vapor, excited at 365 nm. The  $\lambda_{em}$  locates at 622, 638 and 640 nm after exposure in  $\text{CH}_2\text{Br}_2$ ,  $\text{CH}_2\text{I}_2$ ,  $\text{CHBr}_3$ , respectively.

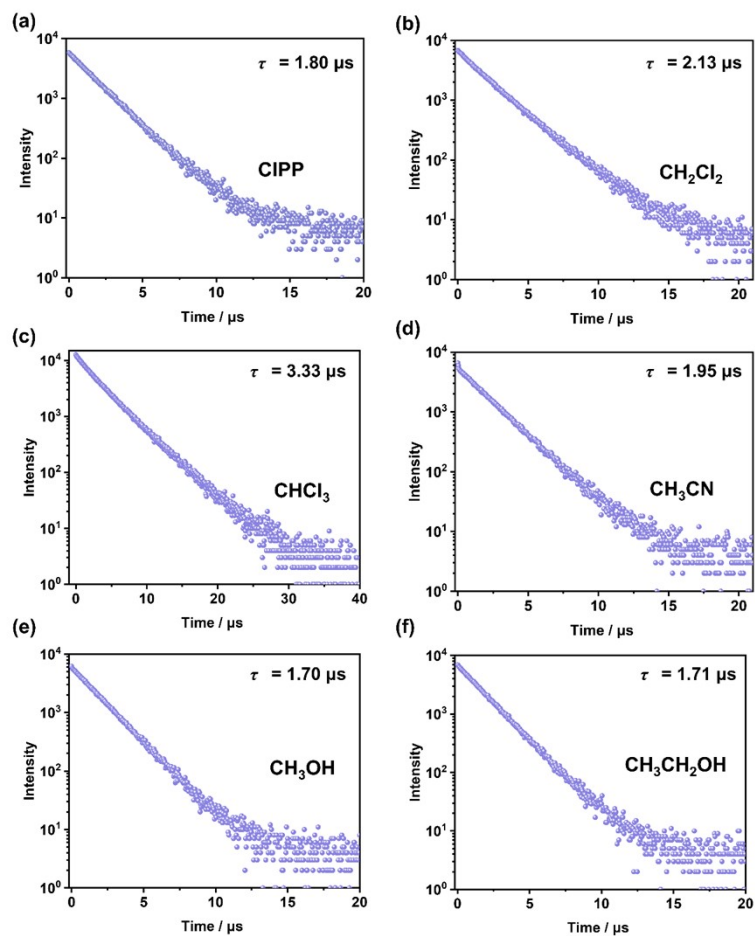

**Fig. S8.** The decay curves of CIPP before and after exposure in different vapors, excited by 375-nm VPL and detected at  $\lambda_{em}$ .

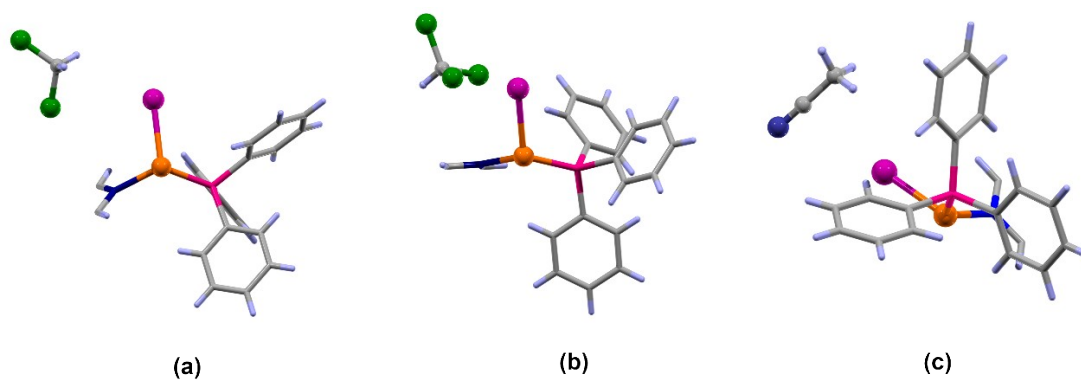

**Fig. S9.** The asymmetric units of (a) CIPP-D, (b) CIPP-C and (c) CIPP-A, respectively. Color codes: Cu, orange; I, purple; Cl, green; N, indigo; P, pink; C, gray; H, light purple.

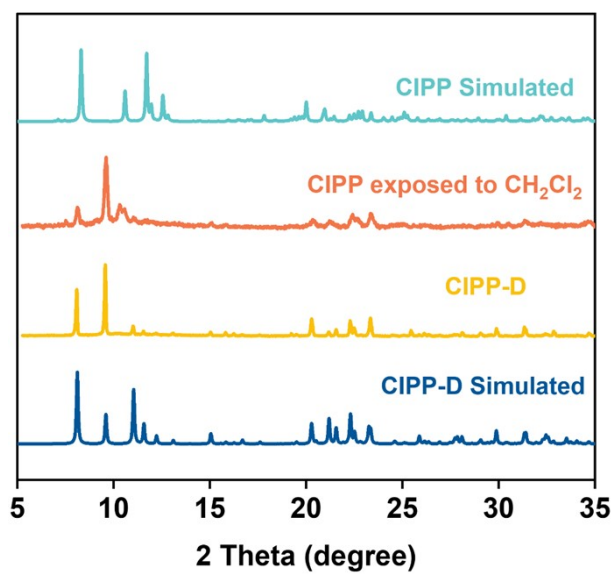

**Fig. S10.** PXRD patterns of the as-synthesized **CIPP-D** and **CIPP** was exposed in saturated  $\text{CH}_2\text{Cl}_2$  vapor for 3 hours, respectively.

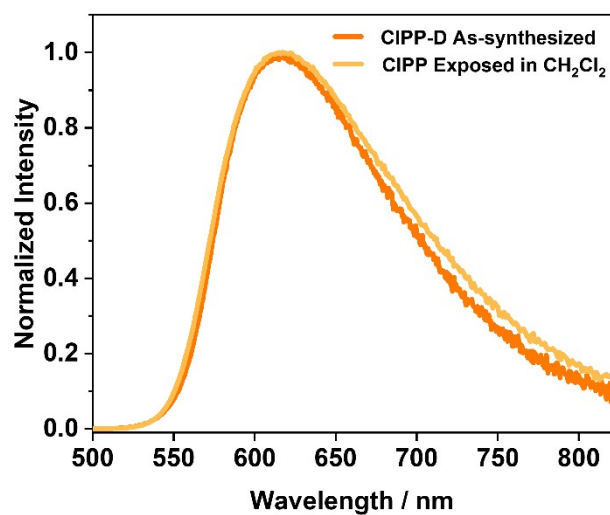

**Fig. S11.** Emission spectra of the as-synthesized **CIPP-D** and **CIPP** powder after exposure in  $\text{CH}_2\text{Cl}_2$  vapor, excited at 365 nm.

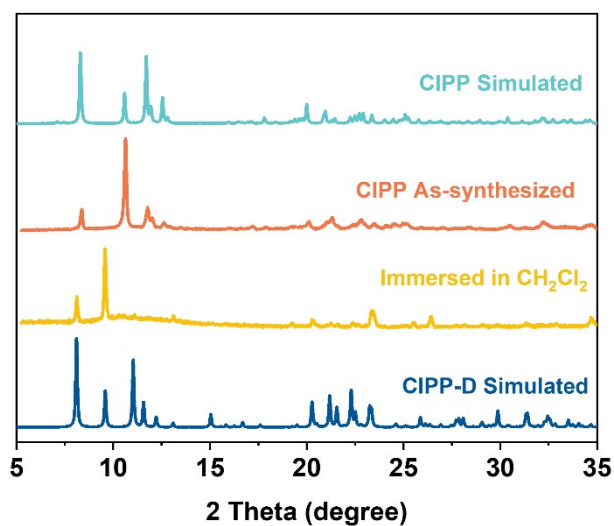

Fig. S12. PXRD patterns of CIPP before and after immersing in CH<sub>2</sub>Cl<sub>2</sub> solvent.

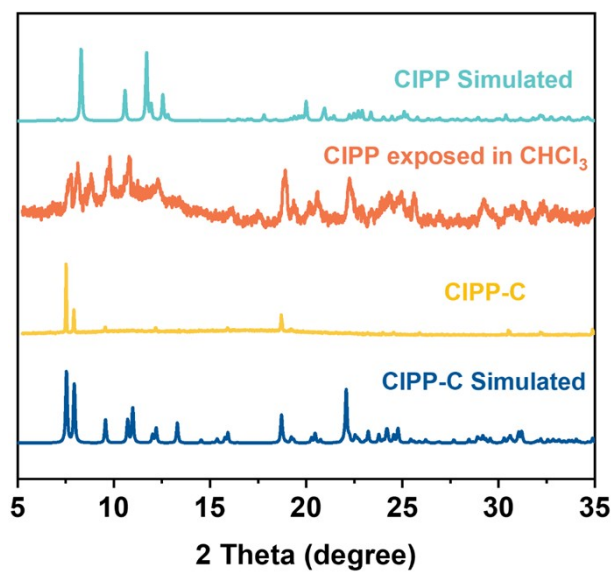

Fig. S13. PXRD patterns of CIPP before and after exposure in CHCl<sub>3</sub> saturated vapor for 3 h.



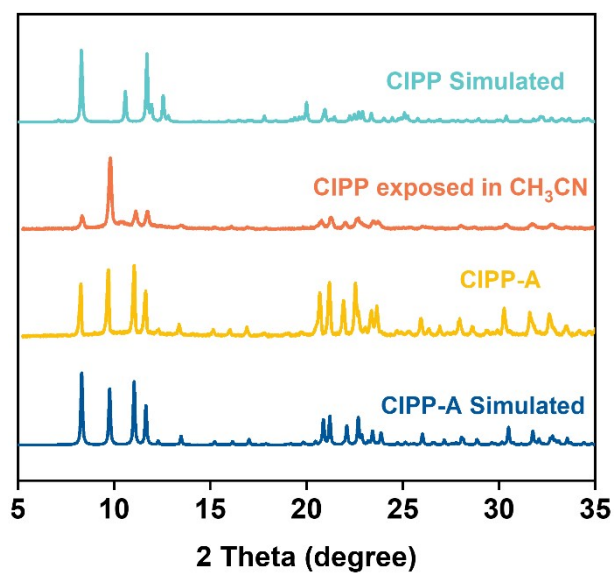

**Fig. S14.** PXRD patterns of the as-synthesized **CIPP-A** and **CIPP** after exposure in saturated  $\text{CH}_3\text{CN}$  vapor for 3 hours, respectively.

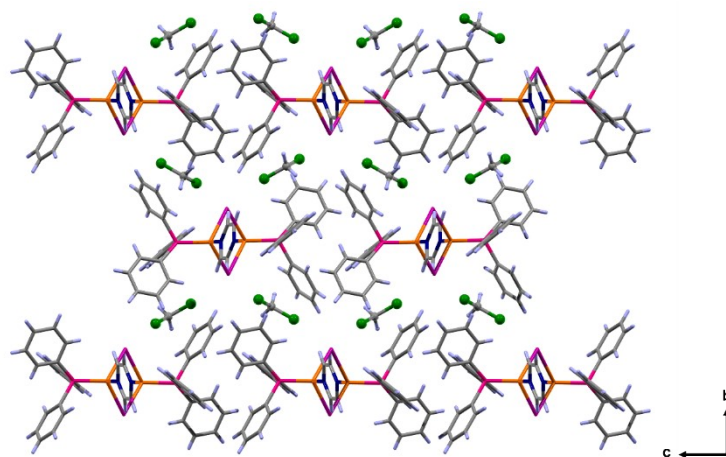

**Fig. S15.** The stacking mode of chains in **CIPP-D** along the  $a$ -axis. Color codes: Cu, orange; I, purple; Cl, green; N, indigo; P, pink; C, gray; H, light purple.

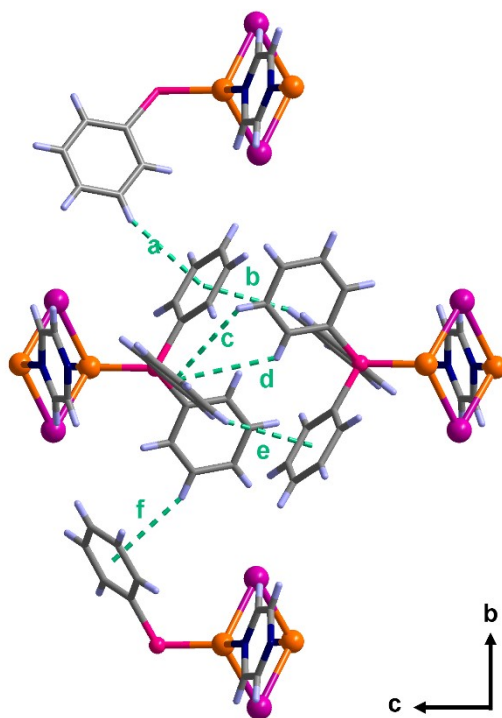

**Fig. S16.** The chain stacking by C–H··· $\pi$  interaction between triphenylphosphine ligands in **CIPP-D**. a, 3.21 Å; b, 3.20 Å; c, 3.38 Å; d, 3.49 Å; e, 3.20 Å; f, 3.21 Å.

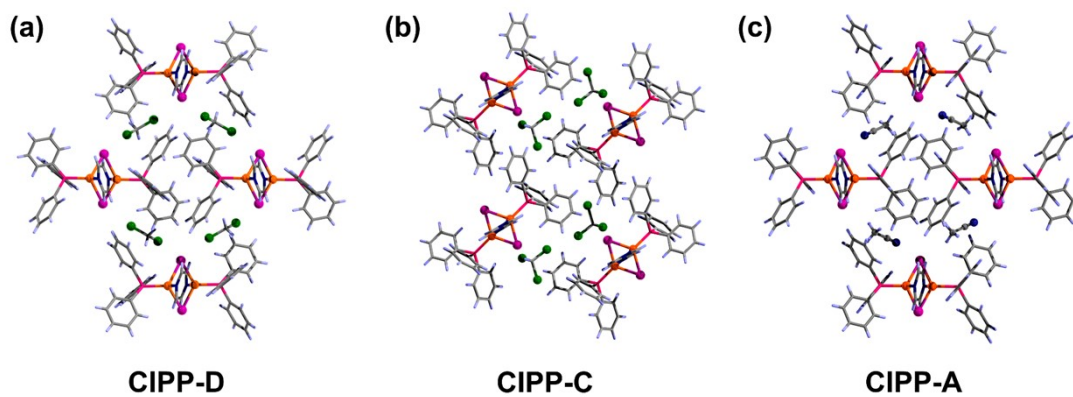

**Fig.S17.** The guests that located in the cavities of (a) **CIPP-D**, (b) **CIPP-C**, and (c) **CIPP-A**, respectively. Color codes: Cu, orange; I, purple; Cl, green; N, indigo; P, pink; C, gray; H, light purple.

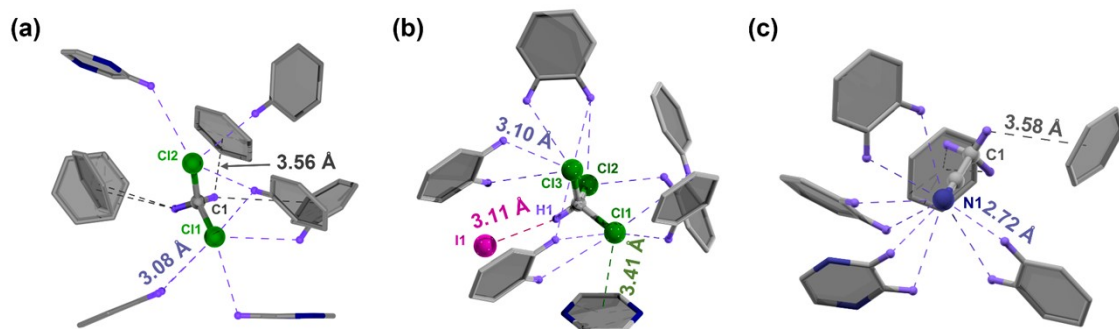

**Fig. S18.** Intramolecular interactions between guest molecules with the frameworks of (a) **CIPP-D**, (b) **CIPP-C** and (c) **CIPP-A**, respectively. The corresponding distances of interactions are shown in Table S3. Purple dotted line, Cl/N...H; green dotted line, Cl... $\pi$ ; grey dotted line, C-H... $\pi$ ; pink dotted line, I...H.

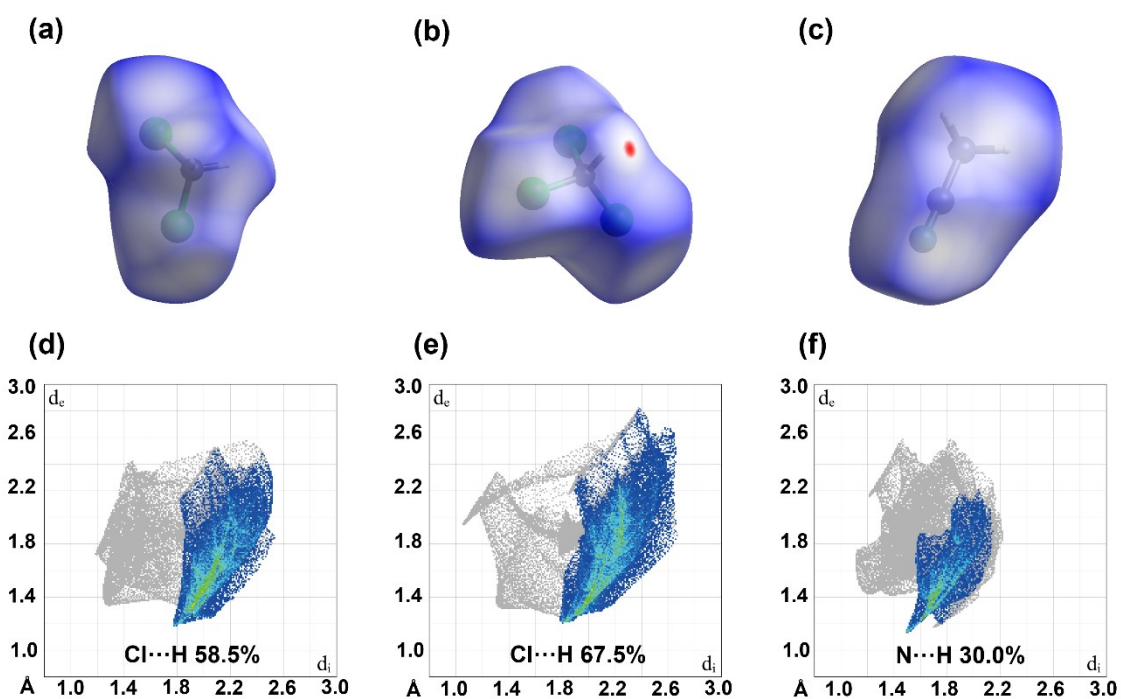

**Fig. S19.** Hirshfeld surfaces of (a)  $\text{CH}_2\text{Cl}_2$  in **CIPP-D**, (b)  $\text{CHCl}_3$  in **CIPP-C**, (c)  $\text{CH}_3\text{CN}$  in **CIPP-A**. The 2D fingerprint plots of Hirshfeld surfaces for (d)  $\text{CH}_2\text{Cl}_2$ , (e)  $\text{CHCl}_3$  and (f)  $\text{CH}_3\text{CN}$ .

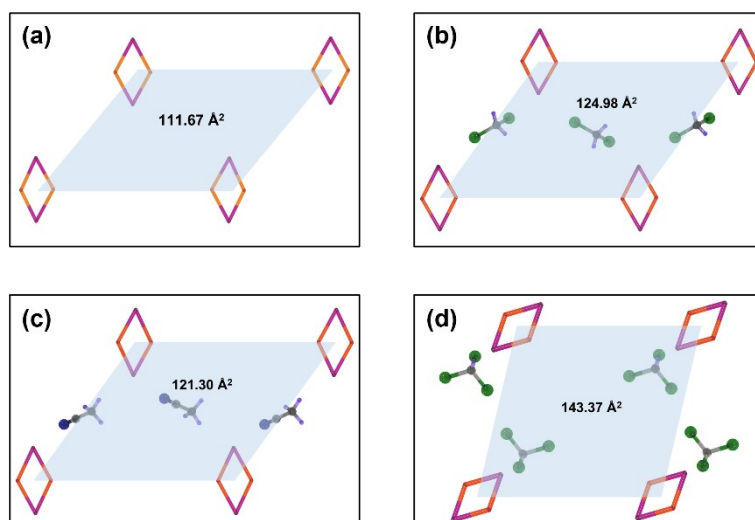

**Fig. S20.** The occupied areas of adjacent chains in (a) **CIPP**, (b) **CIPP-D**, (c) **CIPP-A**, (d) **CIPP-C**, respectively.

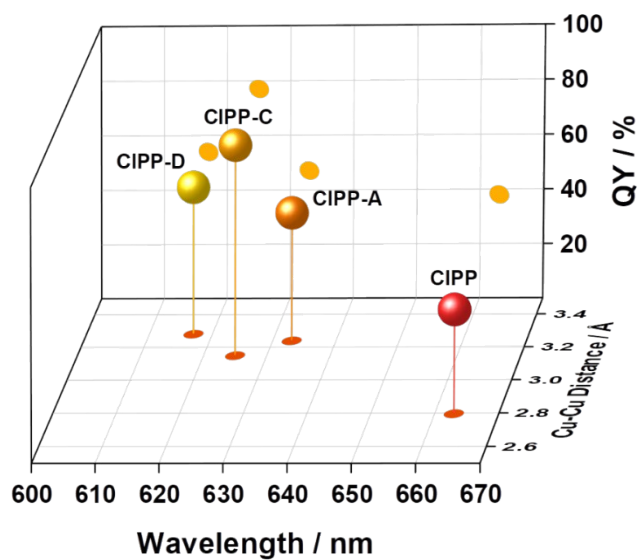

**Fig. S21.** Emission wavelengths, Cu...Cu distances and PLQYs of **CIPP**, **CIPP-D**, **CIPP-C** and **CIPP-A**, respectively.

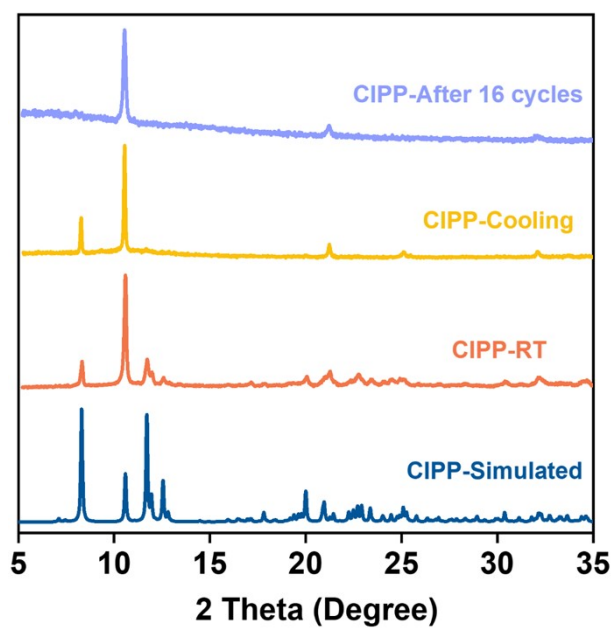

**Fig. S22.** PXRD patterns of the as-synthesized CIPP at room temperature (RT), CIPP that was heated at 318 K and then cooled to the room temperature, and after 16 heating/cooling cycles, respectively.

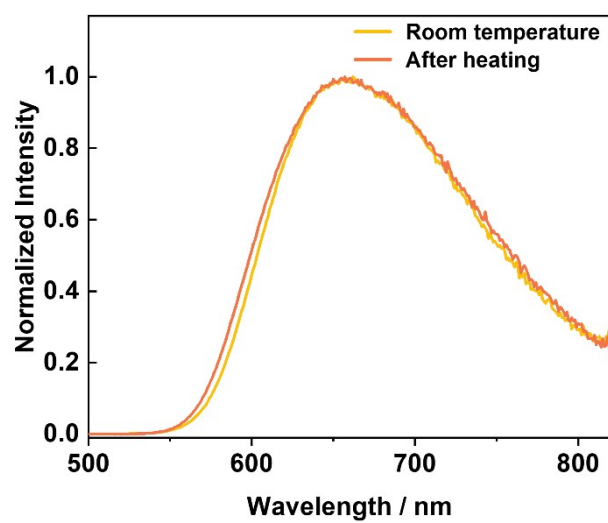

**Fig. S23.** Emission spectra of the as-synthesized CIPP and CIPP that was heated at 318 K and then cooled to the room temperature, respectively, excited at 365 nm.

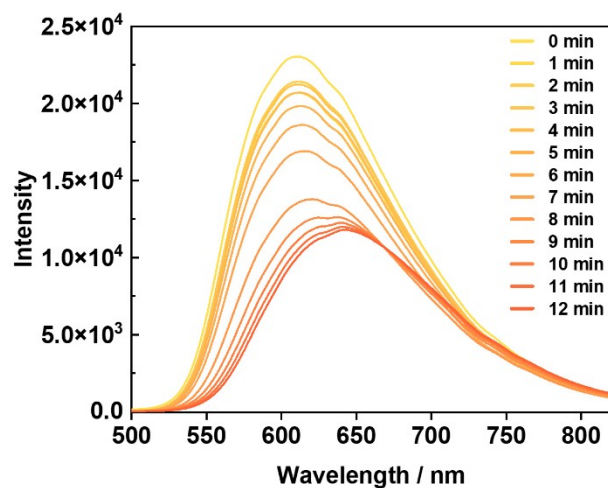

Fig. S24. Time-dependent emission spectra of spontaneous desorption of **CIPP-D** measured with a CCD detector, excited at 365 nm.

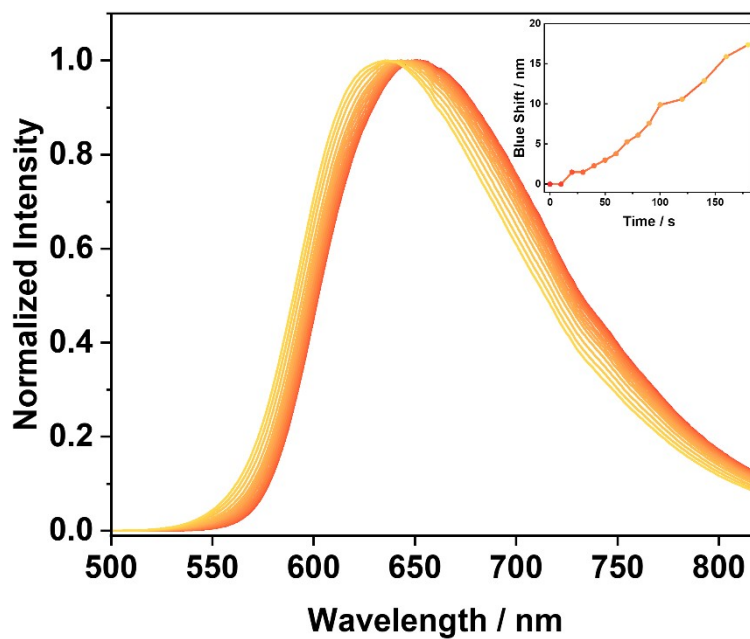

Fig. S25. Time-dependent emission spectra of **CIPP** in  $\text{CHCl}_3$  saturated vapor, measured with a CCD detector, excited at 365 nm. Insert: Time-dependent blue shift of  $\lambda_{\text{em}}$ .

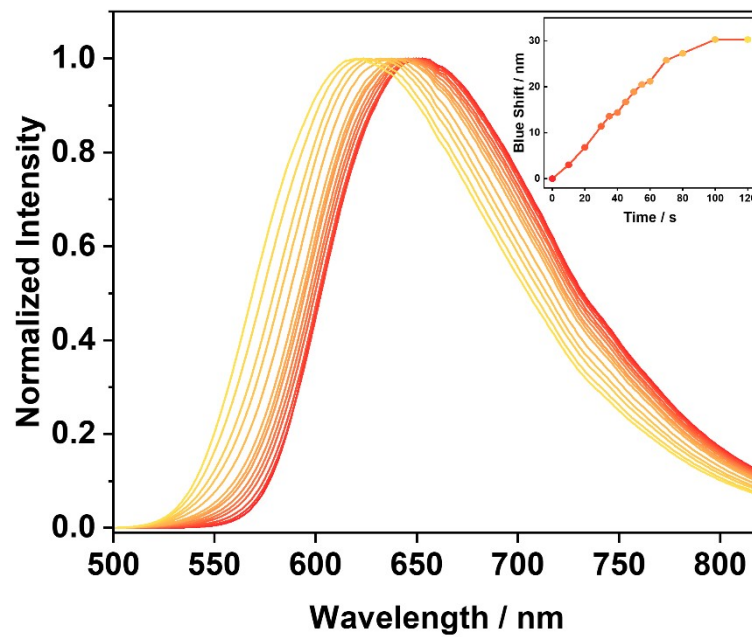

**Fig. S26.** Time-dependent emission spectra of CIPP in CH<sub>3</sub>CN saturated vapor, measured with a CCD detector, excited at 365 nm. Insert: Time-dependent blue shift of  $\lambda_{em}$ .

**Table S1.** Crystallographic data and structure refinement parameters.

| Compounds                                                       | CIPP                                                                                         | CIPP-150K                                                                                    | CIPP-D                                                | CIPP-C                                                | CIPP-A                                              |
|-----------------------------------------------------------------|----------------------------------------------------------------------------------------------|----------------------------------------------------------------------------------------------|-------------------------------------------------------|-------------------------------------------------------|-----------------------------------------------------|
| Formula                                                         | C <sub>60</sub> H <sub>51</sub> Cu <sub>3</sub> I <sub>3</sub> N <sub>3</sub> P <sub>3</sub> | C <sub>60</sub> H <sub>51</sub> Cu <sub>3</sub> I <sub>3</sub> N <sub>3</sub> P <sub>3</sub> | C <sub>21</sub> H <sub>19</sub> Cl <sub>2</sub> CuINP | C <sub>21</sub> H <sub>18</sub> Cl <sub>3</sub> CuINP | C <sub>22</sub> H <sub>20</sub> CuIN <sub>2</sub> P |
| Formula weight                                                  | 1478.27                                                                                      | 1478.27                                                                                      | 577.68                                                | 612.12                                                | 533.81                                              |
| <i>T</i> (K)                                                    | 299.0(6)                                                                                     | 150.00(10)                                                                                   | 299.01(19)                                            | 298.83(10)                                            | 149.99(10)                                          |
| Crystal system                                                  | Monoclinic                                                                                   | Monoclinic                                                                                   | Monoclinic                                            | Triclinic                                             | Monoclinic                                          |
| Space group                                                     | <i>C2/c</i>                                                                                  | <i>I2/a</i>                                                                                  | <i>P2<sub>1</sub>/n</i>                               | <i>P-1</i>                                            | <i>P2<sub>1</sub>/n</i>                             |
| <i>a</i> (Å)                                                    | 29.6215(17)                                                                                  | 28.0131(14)                                                                                  | 8.9147(2)                                             | 8.82120(10)                                           | 8.9442(3)                                           |
| <i>b</i> (Å)                                                    | 16.6994(4)                                                                                   | 16.5872(6)                                                                                   | 18.4311(4)                                            | 12.1444(2)                                            | 18.0966(5)                                          |
| <i>c</i> (Å)                                                    | 28.2794(18)                                                                                  | 27.2755(13)                                                                                  | 13.5398(4)                                            | 12.2371(2)                                            | 13.1452(4)                                          |
| $\alpha$ (°)                                                    | 90                                                                                           | 90                                                                                           | 90                                                    | 74.734(2)                                             | 90                                                  |
| $\beta$ (°)                                                     | 123.011(8)                                                                                   | 115.762(6)                                                                                   | 93.423(2)                                             | 69.225(2)                                             | 93.281(3)                                           |
| $\gamma$ (°)                                                    | 90                                                                                           | 90                                                                                           | 90                                                    | 83.1210(10)                                           | 90                                                  |
| <i>V</i> (Å <sup>3</sup> )                                      | 11730.5(14)                                                                                  | 11414.1(10)                                                                                  | 2220.72(10)                                           | 1181.95(4)                                            | 2124.19(11)                                         |
| <i>Z</i>                                                        | 8                                                                                            | 8                                                                                            | 4                                                     | 2                                                     | 4                                                   |
| <i>R</i> <sub>int</sub>                                         | 0.0528                                                                                       | 0.0456                                                                                       | 0.0457                                                | 0.0389                                                | 0.0538                                              |
| <sup>a</sup> <i>R</i> <sub>1</sub> [ <i>I</i> ≥ 2σ( <i>I</i> )] | 0.0492                                                                                       | 0.0634                                                                                       | 0.0385                                                | 0.0312                                                | 0.0370                                              |
| <sup>b</sup> <i>wR</i> <sub>2</sub>                             | 0.1534                                                                                       | 0.1954                                                                                       | 0.1009                                                | 0.0840                                                | 0.0943                                              |
| GOF                                                             | 1.052                                                                                        | 1.136                                                                                        | 1.048                                                 | 1.074                                                 | 0.998                                               |

$$^a R_1 = \sum ||F_o| - |F_c|| / \sum |F_o|.$$

$$^b wR_2 = \frac{[\sum w(F_o^2 - F_c^2)^2]}{[\sum w(F_o^2)]^{1/2}}$$



**Table S2.** The binding energy of host-guest interaction.

| $E(\text{CIPP-D}) / \text{kJ mol}^{-1}$ | $E(\text{CIPP-D} - \text{CH}_2\text{Cl}_2) / \text{kJ mol}^{-1}$ | $E(\text{CH}_2\text{Cl}_2) / \text{kJ mol}^{-1}$ | $\Delta E / \text{kJ mol}^{-1}$ |
|-----------------------------------------|------------------------------------------------------------------|--------------------------------------------------|---------------------------------|
| -5992987.04                             | -3531718.70                                                      | -2461183.30                                      | 85.04                           |
| $E(\text{CIPP-C}) / \text{kJ mol}^{-1}$ | $E(\text{CIPP-C} - \text{CHCl}_3) / \text{kJ mol}^{-1}$          | $E(\text{CHCl}_3) / \text{kJ mol}^{-1}$          | $\Delta E / \text{kJ mol}^{-1}$ |
| -7171664.96                             | -3531706.26                                                      | -3639862.70                                      | 96.00                           |
| $E(\text{CIPP-A}) / \text{kJ mol}^{-1}$ | $E(\text{CIPP-A} - \text{CH}_3\text{CN}) / \text{kJ mol}^{-1}$   | $E(\text{CH}_3\text{CN}) / \text{kJ mol}^{-1}$   | $\Delta E / \text{kJ mol}^{-1}$ |
| -3872084.45                             | -3531725.88                                                      | -340272.90                                       | 85.67                           |

**Table S3.** The host-guest interaction distances.

| Compounds | Cl/N...H    | C-H... $\pi$ | Cl... $\pi$ | I...H |
|-----------|-------------|--------------|-------------|-------|
| CIPP-D    | Cl1...H / Å |              |             |       |
|           | 3.077       |              |             |       |
|           | 3.153       |              |             |       |
|           | 3.238       | 3.563        |             |       |
|           | 3.257       | 3.982        | -           | -     |
|           | 3.334       | 4.121        |             |       |
|           | Cl2...H / Å | 4.172        |             |       |
|           | 3.315       |              |             |       |
|           | 3.333       |              |             |       |
|           | 3.354       |              |             |       |
| CIPP-C    | Cl1...H / Å |              |             |       |
|           | 3.408       |              |             |       |
|           | 3.464       |              |             |       |
|           | 3.495       |              |             |       |
|           | Cl2...H / Å |              |             |       |
|           | 3.307       |              |             |       |
|           | 3.151       | -            | 3.414       | 3.108 |
|           | Cl3...H / Å |              |             |       |
|           | 3.094       |              |             |       |
|           | 3.124       |              |             |       |
| 3.283     |             |              |             |       |
| 3.287     |             |              |             |       |
| 3.536     |             |              |             |       |
| CIPP-A    | N1...H / Å  |              |             |       |
|           | 2.725       |              |             |       |
|           | 2.935       | 3.585        |             |       |
|           | 3.025       | 3.569        | -           | -     |
|           | 3.041       | 3.755        |             |       |
|           | 3.062       |              |             |       |
|           | 3.068       |              |             |       |
|           | 3.377       |              |             |       |

## References

- 1 J. P. Perdew, K. Burke and M. Ernzerhof, Generalized Gradient Approximation Made Simple. *Phys. Rev. Lett.*, 1996, **77**, 3865-3868.
- 2 S. Grimme, Semiempirical GGA-type density functional constructed with a long-range dispersion correction, *J. Comput. Chem.*, 2006, **27**, 1787-1799.
